# Supplementary material for: Accumulation of cadmium in insulin-producing β cells
Source: PubMed Central journal article supplement — Islets. 2012 Nov 1;4(6):405–16. doi: 10.4161/isl.23101 (PMC3605169; doi:10.4161/isl.23101), 2012-11-01
Supplement: isl-4-405-s01.pdf [file isl-4-405-s01.pdf]

## **Supplemental Material to:**

**Malek El Muayed, Meera R. Raja, Xiaomin Zhang, Keith W. MacRenaris, Surabhi Bhatt, Xiaojuan Chen, Margit Urbanek, Thomas V. O'Halloran and William L. Lowe, Jr.**

**Accumulation of cadmium in insulin producing  $\beta$  cells**

**Islets 2012; 4(6)**

**<http://dx.doi.org/10.4161/isl.23101>**

**<http://www.landesbioscience.com/journals/islets/article/23101>**

**Supplement:**

Supplemental figure 1: Changes in mRNA levels of beta-cell genes in dispersed primary mouse islets following exposure to CdCl<sub>2</sub> for 48 hours relative to control cells (n=5).

Supplemental figure 1:

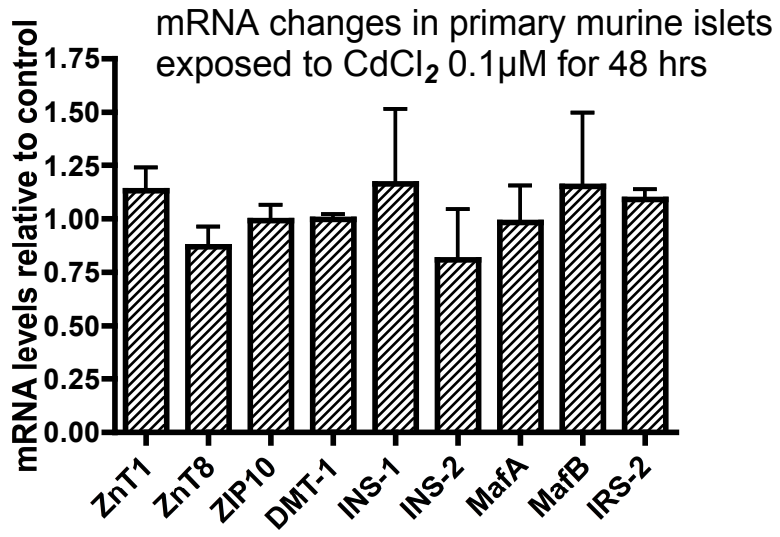

Supplemental Table 1:

|                                               | Cd      | Hg     | Cu   | Ni   | Zn    |
|-----------------------------------------------|---------|--------|------|------|-------|
| City of Hope digestion enzyme (Roche)         | < 0.006 | <0.003 | 0.05 | 0.21 | 0.22  |
| City of Hope purification solution            | < 0.006 | <0.003 | 0.13 | 0.39 | 2.30  |
| City of Hope priming solution                 | < 0.006 | <0.003 | 0.04 | 0.18 | 0.07  |
| City of Hope culture medium                   | < 0.006 | <0.003 | 0.10 | 0.14 | 12.33 |
| City of Hope digestion solution               | < 0.006 | <0.003 | 0.02 | 0.14 | 0.05  |
| City of Hope wash medium                      | < 0.006 | <0.003 | 0.20 | 0.35 | 2.93  |
| Univ of Wisconsin RPMI medium                 | < 0.006 | <0.003 | 0.02 | 0.09 | 0.03  |
| Univ of Wisconsin VW solution                 | < 0.006 | <0.003 | 0.01 | 0.13 | 0.30  |
| Univ of Wisconsin purification solution       | < 0.006 | <0.003 | 0.04 | 0.13 | 0.38  |
| Univ of Wisconsin low density gradient        | < 0.006 | <0.003 | 0.12 | 0.14 | 0.82  |
| Univ of Wisconsin CIT wash solution           | < 0.006 | <0.003 | 0.11 | 0.18 | 1.38  |
| Univ of Wisconsin high density gradient       | < 0.006 | <0.003 | 0.26 | 0.56 | 4.21  |
| Univ of Wisconsin digestion solution          | < 0.006 | <0.003 | 0.02 | 0.07 | 0.03  |
| Univ of Wisconsin culture medium              | < 0.006 | <0.003 | 0.08 | 0.07 | 7.71  |
| Univ of Wisconsin Neutral Protease NB (Serva) | < 0.006 | <0.003 | 0.72 | 0.43 | 59.99 |
| Univ of Wisconsin Collagenase NB1 (Serva)     | < 0.006 | <0.003 | 0.48 | 0.76 | 18.60 |
| Univ. of Miami pre transfer medium            | < 0.006 | <0.003 | 0.13 | 0.27 | 0.33  |
| Univ. of Miami high density gradient          | < 0.006 | <0.003 | 0.39 | 0.19 | 20.49 |
| Univ. of Miami dilution medium                | < 0.006 | <0.003 | 0.03 | 0.05 | 0.05  |
| Univ. of Miami wash medium                    | < 0.006 | <0.003 | 0.14 | 0.06 | 0.42  |
| Univ. of Miami low density gradient           | < 0.006 | <0.003 | 0.37 | 0.23 | 10.03 |
| Univ. of Miami Biocoll isotonic solution      | < 0.006 | <0.003 | 0.35 | 0.10 | 6.94  |
| Univ. of Miami rinse medium                   | < 0.006 | <0.003 | 0.01 | 0.05 | <0.01 |
| Univ. of Miami Digestion Enzyme               | 0.016   | <0.003 | 0.53 | 0.29 | 50.49 |
| Univ. of Miami shipping medium                | < 0.006 | <0.003 | 0.20 | 0.06 | 2.77  |
| Univ. of Miami culture media                  | < 0.006 | <0.003 | 0.22 | 0.06 | 13.59 |
| Transport media                               | < 0.006 | <0.003 | 0.29 | 0.07 | 7.21  |

Supplemental table 1: Concentration of various elements in solutions used during the isolation, culture, and transport of human islets by various IIDP sites (values in  $\mu\text{mol/L}$ )
